# Supplementary material
Source: publisher figshare collection journal article supplement (https://acs.figshare.com/ndownloader/files/20048975)
Supplement: Supplementary file 1 [file 20048975]

# New findings in the signaling pathways of *cis* and *trans* platinum iodido complexes' interaction with DNA of cancer cells.

*Adoración G. Quiroga<sup>\*a</sup>, Marta Cama<sup>a,b</sup>, Natalia Pajuelo-Lozano<sup>b</sup>, Amparo Álvarez-Valdés<sup>a</sup>, Isabel Sanchez Perez<sup>b\*</sup>.*

<sup>a</sup> Inorganic Chemistry Department, Universidad Autónoma de Madrid and IAdChem  
Universidad Autónoma de Madrid, Madrid-28049, Spain

<sup>b</sup> Biochemistry Department, Faculty of Medicine. Instituto de Investigaciones Biomédicas  
Alberto Sols. CSIC-UAM, Madrid-28029, Spain

KEYWORDS platinum complexes, tumoral cells, apoptotic pathways

## SUPPLEMENTARY INFORMATION

|                                                                                                                                                                |   |
|----------------------------------------------------------------------------------------------------------------------------------------------------------------|---|
| S.1. Synthesis and characterization of the platinum complexes.....                                                                                             | 3 |
| S1.1. Syntheses of the chlorido complexes: .....                                                                                                               | 3 |
| S1.2. Syntheses of the iodido complexes: .....                                                                                                                 | 3 |
| S1.3. References .....                                                                                                                                         | 3 |
| Table SM1. Crystal data of <i>trans</i> -[Pt(9-EtG) <sub>2</sub> (ipa) <sub>2</sub> ](NO <sub>3</sub> ) <sub>2</sub> .....                                     | 4 |
| Table SM2: Selected bond distances and angles for the structure of <i>trans</i> -[Pt(9-EtG) <sub>2</sub> (ipa) <sub>2</sub> ](NO <sub>3</sub> ) <sub>2</sub> . | 5 |

### S.1. Synthesis and characterization of the platinum complexes.

#### S1.1. Syntheses of the chlorido complexes:

We used our previous methods, following the exact procedure that we have already published. Briefly the characterization as follows:

*cis*-[PtCl<sub>2</sub>(ipa)<sub>2</sub>]**1**: Yield 92%. Elemental analysis CHN, found: C, 18.70; H, 4.60; N, 7.30. Calc for C<sub>6</sub>H<sub>18</sub>N<sub>2</sub>Cl<sub>2</sub>Pt: C, 18.75; H, 4.72; N, 7.29.  $\delta_{\text{H}}$ (300.13 MHz; DMSO-*d*<sub>6</sub>) 1.2 (6 H, d,  $J_{\text{HH}}$  6.5, CH<sub>3</sub>), 3.1 (1 H, sept,  $J_{\text{HH}}$  6.5, CH), 4.7 (\* bs, NH<sub>2</sub>);  $\delta_{\text{C}}$ (125.7 MHz; DMSO-*d*<sub>6</sub>) 23.5 (CH<sub>3</sub>), 47.6 (CH).

*trans*-[PtCl<sub>2</sub>(ipa)(dma)]**2**, Yield 49%. Elemental analysis CHN, found: C, 13.50; H, 3.70; N, 7.90. Calc for C<sub>4</sub>H<sub>14</sub>N<sub>2</sub>Cl<sub>2</sub>Pt: C, 13.48; H, 3.96; N, 7.86.  $\delta_{\text{H}}$ (300.13 MHz; CDCl<sub>3</sub>) 1.33 (6 H, d,  $J_{\text{HH}}$  6.5, CH<sub>3</sub>-ipa), 2.5 (3 H, t,  $J_{\text{HH}}$  6.5, CH<sub>3</sub>-ma), 3.3 (1 H, sept,  $J_{\text{HH}}$  6.5, CH), 3.4 (\* bs, NH<sub>2</sub>);  $\delta_{\text{C}}$ (75.47 MHz; CDCl<sub>3</sub>) 23.97 (CH<sub>3</sub>-ipa), 33.22 (CH<sub>3</sub>-ma), 48.38 (CH);  $\delta_{\text{Pt}}$ (64.53 MHz; CDCl<sub>3</sub>; Na<sub>2</sub>PtCl<sub>6</sub>) -2175.

\*Signals that interchanged with the D<sub>2</sub>O addition.

#### S1.2. Syntheses of the iodido complexes:

Dhara's method<sup>1</sup> and Rochon's method<sup>2</sup> were followed with a few modifications:

*trans*-[PtI<sub>2</sub>(ipa)<sub>2</sub>] **3**: *cis*-PtI<sub>2</sub>(ipa)<sub>2</sub> **4** 0.500g (0.9 mmol) were suspended in water and the isopropylamine (4,5 mmol) was added to the solution and heated at reflux temperature until turned to clear solution. The clear solution was concentrated at high temperature (100°C) until detection of a bright orange solid which was allowed to stand overnight at 4°C until complete precipitation. Then the orange/yellow solid was filtered off, wash with warm water and dried in a Buchi glass oven with drying tube assembly. Afterwards recrystallization in

chloroform/ether is in some cases required orange solid. Yied: 59%. Anal. Found for  $C_6H_{19}N_2O_{0.5}I_2Pt$ : C, 11.96; H, 3.10; N, 5.03 Calcd: C, 12.00; H, 3.30; N, 4.78. NMR (Acetone- $d_6$ ) ppm.  $\delta$  ( $^1H$ ): 1.3 (d, 6H) 3.4 (sp, 1H) 3.9 (b.s, 2H).  $\delta$  ( $^{13}C$ ): 24.5(C1), 51.5(C2),  $\delta$  ( $^{195}Pt$ ) -3330 ppm.

*cis*-[PtI<sub>2</sub>(ipa)<sub>2</sub>]**4**. Dhara's method<sup>1</sup> and Rochon's method<sup>2</sup> were followed with a few modifications: 2.4 mmol of K<sub>2</sub>PtCl<sub>4</sub> were dissolved in water and KI was added in a large excess (1:10) to produce a dark solution. After 15 minutes of stirring (to complete K<sub>2</sub>PtI<sub>4</sub> formation), the base (4.8 mmol) was added to the solution and stirred at room temperature until the yellow precipitated had been formed. Then, the yellow solid was immediately isolated, washed with extensively warm water, EtOH and Ether and dried under vacuum. yellow solid. Yield: 54%. NMR (Acetona- $d_6$ ):  $\delta$  ( $^1H$ ): 1.18(d, J=6.5 Hz, 6H, CH<sub>3</sub>), 3.46 (sept., J=6.3Hz, 1H, CH), 4.25 (b.s, 2H);  $\delta$  ( $^{13}C$ ) 23.3 (2 CH<sub>3</sub>), 48.9(CH);  $\delta$  ( $^{195}Pt$ ) -3507.27 ppm. Anal. Calcd for  $C_6H_{18}N_2I_2Pt$  C, 12.70; H, 3.20; N, 4.94. Found: C, 12.00; H, 3.64; N, 5.00.

### S1.3. References

1. Dhara, S. C., A rapid method for the Synthesis of *cis*-[Pt(NH<sub>3</sub>)<sub>2</sub>Cl<sub>2</sub>]. *Ind. J. Chem.* **1970**, 8, 193-194.
2. Rochon, F. D.; Buculei, V., Multinuclear NMR study and crystal structures of complexes of the types *cis*- and *trans*-Pt(amine)<sub>2</sub>I<sub>2</sub>. *Inorg. Chim. Acta* **2004**, 357 (8), 2218-2230.

**Table SM1. Crystal data of *trans*-[Pt(9-EtG)<sub>2</sub>(ipa)<sub>2</sub>](NO<sub>3</sub>)<sub>2</sub>**

|                      |                                                                                                                     |
|----------------------|---------------------------------------------------------------------------------------------------------------------|
| Chemical formula     | C <sub>20</sub> H <sub>36</sub> N <sub>14</sub> O <sub>10</sub> Pt                                                  |
| formula weight       | 827.71                                                                                                              |
| Temperature          | 100(2) K                                                                                                            |
| Wavelength           | 0.71073 Å                                                                                                           |
| Crystal size         | 0.08 x 0.10 x 0.18 mm                                                                                               |
| Crystal habit        | Incoloro prismático                                                                                                 |
| Crystal system       | Triclínico                                                                                                          |
| Space group          | P-1                                                                                                                 |
| Unit Cell dimensions | a = 7.9762(12) Å      α = 104.586(7)<br>b = 9.7305(14) Å      β = 92.179(7)<br>c = 10.3506(13) Å      γ = 96.643(7) |
| Volumen              | 770.34(19) Å <sup>3</sup>                                                                                           |
| Z                    | 1                                                                                                                   |

|                        |                          |
|------------------------|--------------------------|
| Density(calculated)    | 1.784 mg/cm <sup>3</sup> |
| Absorption coefficient | 4.628 mm <sup>-1</sup>   |
| F(000)                 | 412                      |

CCDC 1946387 contains the supplementary crystallographic data for this paper. These data can be obtained free of charge via <http://www.ccdc.cam.ac.uk/conts/retrieving.html> (or from the CCDC, 12 Union Road, Cambridge CB2 1EZ, UK; Fax: +44 1223 336033; E-mail: [deposit@ccdc.cam.ac.uk](mailto:deposit@ccdc.cam.ac.uk)).

**Table SM2: Selected bond distances and angles for the structure of *trans*-[Pt(9-EtG)<sub>2</sub>(ipa)<sub>2</sub>](NO<sub>3</sub>)<sub>2</sub>**

| <b>Bond distances (Å)</b>                         |          |
|---------------------------------------------------|----------|
| Pt <sub>1</sub> - N <sub>7</sub>                  | 2.019(4) |
| Pt <sub>1</sub> - N <sub>1</sub>                  | 2.061(4) |
| <b>angles (°)</b>                                 |          |
| N <sub>1</sub> - Pt <sub>1</sub> - N <sub>1</sub> | 180.0    |
| N <sub>7</sub> - Pt <sub>1</sub> - N <sub>7</sub> | 180.0(2) |
| N <sub>7</sub> - Pt <sub>1</sub> - N <sub>1</sub> | 91.05    |
